# Supplementary material for: Effect of Providing Multiple Micronutrients in Powder through Primary Healthcare on Anemia in Young Brazilian Children: A Multicentre Pragmatic Controlled Trial
Source: PubMed Central journal article supplement (PMC4790963; doi:10.1371/journal.pone.0151097), 2016-03-14
Supplement: pone.0151097.s001.pdf [file pone.0151097.s001.pdf]

## Supporting Information File

Trial study protocol at [www.ensaiosclinicos.gov.br](http://www.ensaiosclinicos.gov.br)

**RBR-5ktv6b**

**Effectiveness of home fortification with vitamins and minerals for the prevention of iron deficiency and anemia in infants younger than 1 year of age: a multi-center study of Brazilian cities.**

Registration Date: April 3, 2012, 1:42 p.m.

Last Update: Sept. 11, 2013, 10:10 a.m.

### Study Type:

Intervention Study

### Scientific Title:

Efetividade da fortificação caseira com vitaminas e minerais na prevenção da deficiência de ferro e anemia em crianças menores de um ano: estudo multicêntrico em cidades brasileiras.

Effectiveness of home fortification with vitamins and minerals for the prevention of iron deficiency and anemia in infants younger than 1 year of age: a multi-center study of Brazilian cities.

### Trial Identification

- **UTN Number:** U1111-1129-7089

- **Public Title:**

Fortificação caseira da alimentação complementar no Brasil: ensaio pragmático multicêntrico

Home fortification of complementary feeding in Brazil: a multicenter pragmatic trial

- **Scientific Acronym:**

ENFAC: Estudo Nacional de Fortificação caseira da Alimentação Complementar

ENFAC: Brazilian study for home fortification of complementary feeding

- **Public Acronym:**

ENFAC: Estudo Nacional de Fortificação caseira da Alimentação Complementar

ENFAC: Brazilian study for home fortification of complementary feeding

- **Secondary Identifying Numbers:**

- 2291/2012

Issuing Authority: Comitê de Ética em Pesquis da Faculdade de Saúde Pública da Universidade de São Paulo

## Sponsors

- **Primary Sponsor:** Ministério da Saúde

- **Secondary Sponsors:**

- **Institution:** CNPq

- **Source(s) of Monetary or Material Support:**

- **Institution:** Ministério da Saúde

- **Institution:** UNICEF

## Health Conditions

- **Health Condition(s) or Problem(s):**

Anemia Ferropriva

Anemia, Iron-Deficiency

- **General Descriptors for Health Condition(s):**

**C18:** Doenças nutricionais e metabólicas

**C18:** Enfermedades nutricionales y metabólicas

**C18:** Nutritional and metabolic diseases

- **Specific Descriptors for Health Condition(s):**

**C15.378.071.196.300:** Anemia Ferropriva

**C15.378.071.196.300:** Anemia Ferropénica

**C15.378.071.196.300:** Anemia, Iron-Deficiency

## Interventions

- Intervention Code(s)
- Dietary supplement

- **Interventions:**

PT-BR

Grupo experimental: 675 crianças de 6-8 meses acompanhadas na atenção básica à saúde (modelos tradicional e programa de saúde da família) receberão 60 sachês de 1 g cada de polivitamínico e mineral, para ser administrado 1 vez por dia com alimentos semi-sólidos (papas de fruta ou papas salgadas) na hora de servir, durante 60 dias. Composição do sachê (1g) polivitamínico e mineral: Ferro 10 mg, Zinco 4,1 mg, Ácido fólico 150 µg, Vitamina A 400 µg RE, Vitamina C 30 mg, Vitamina D3 5 µg, Vitamina E 5 mg TE, Vitamina B1 0,5 mg, Vitamina B2 0,5 mg, Vitamina B6 0,5 mg, Vitamina B12 0,9 µg, Niacina 6 mg, Cobre 0,56 mg, Iodo 90 µg, Selênio 17 µg.

Grupo controle: 675 crianças de 12 a 14 meses de idade acompanhadas na atenção básica à saúde (modelos tradicional e programa de saúde da família) em atendimento de acordo com a rotina de puericultura vigente com programa de suplementação com sulfato ferroso.

Intervention group: 675 infants aged 6-8 months at recruitment from basic health care (traditional and health Family programs) will receive 60 multiple micronutrient powder (MNP) to be given once a day with semi-solid foods (fruit puree or salty meals) during 60 days. The composition of each sachet (1g): Iron 10 mg, Zinc 4,1 mg, Folate 150 µg, Vitamin A 400 µg RE, Vitamin C 30 mg, Vitamin D3 5 µg, Vitamin E 5 mg TE, Vitamin B1 0,5 mg, Vitamin B2 0,5 mg, Vitamin B6 0,5 mg, Vitamin B12 0,9 µg, Niacin 6 mg, Copper 0,56 mg, Iodine 90 µg, Selenium 17 µg.

Control group: 675 infants aged 12-14 months attending at the current usual basic health care (traditional and health Family programs) attending at the current routine care with ferrous sulfate supplementation.

- **Descriptor for Intervention(s):**

**SP6.051.227:** Suplementação Alimentar

**SP6.051.227:** Alimentación Suplementaria

## Recruitment

- **Recruitment Status:** Recruitment completed

- **Recruitment Country**

- Brazil

- **Planned Date of First Enrollment:** 2012-06-13

- **Planned Date of Last Enrollment:** 2013-01-04

-

| Target Sample Size: | Gender (inclusion sex): | Inclusion Minimum Age: | Inclusion Maximum Age: |
|---------------------|-------------------------|------------------------|------------------------|
| 1350                | -                       | 6 M                    | 15 M                   |

---

- **Inclusion Criteria:**

Grupo intervenção: crianças entre 6 e 8 meses de idade no recrutamento (6 meses antes da medida de desfecho)

Grupo controle: crianças entre 12 e 14 meses para medida de desfecho.

Intervention group: infants between 6 and 8 months at the enrollment(6 months before outcome measures)

Control group: infants between 12 and 14 months at outcome measures

- **Exclusion Criteria:**

Casos referidos de malária, positividade para HIV, tuberculose, hemoglobinopatias e estar em tratamento para anemia.

Reported cases of malaria, positive for HIV, tuberculosis, hemoglobinopathies, and in treatment for anemia.

## Study Type

- **Study Design:**

Ensaio clínico de prevenção, controlado não-randomizado, paralelo, aberto, com dois braços, prospectivo, de fase 3.

Prevention Clinical trial, non-randomized controlled, parallel, open, 2 arms, prospective, fase 3.

| Expanded access program | Study Purpose | Intervention Assignment | Number of arms | Masking type | Allocation type           | Study Phase |
|-------------------------|---------------|-------------------------|----------------|--------------|---------------------------|-------------|
| False                   | Prevention    | Parallel                | 2              | Open         | Non-randomized-controlled | 3           |

## Outcomes

- **Primary Outcomes:**

Diferença média de hemoglobina sanguínea de pelo menos 6 g/L

A mean difference in the blood hemoglobin of at least 6 g/L

- **Secondary Outcomes:**

Redução da prevalência de anemia e deficiência de ferro.

Decreased prevalence of anemia and iron deficiency.

## Contacts

- **Contacts for Public Queries**

- **Full Name:** Marly Augusto Cardoso

- **Address:** Av Dr Arnaldo 715

- **City:** São Paulo / Brazil

- **Zip Code:** 01246--904

- **Telephone:** +5-5-11--30617705

- **E-mail:** marlyac@usp.br

- **Affiliation:** University of Sao Paulo
